14 Keywords: annotation, chicken, enrichment analysis, MeSH, semantic similarity

15

16 Running title: MeSH annotation of the chicken genome

17

18 Corresponding author:

19 Gota Morota

20 Department of Animal Science

21 University of Nebraska-Lincoln

22 PO Box 830908

23 Lincoln, NE 68583-0908, USA.

24 E-mail: morota@unl.edu

25

## 26 Abstract

27 Biomedical vocabularies and ontologies aid in recapitulating biological knowledge. The annotation  
28 of gene products is mainly accelerated by Gene Ontology (GO) and more recently by Medical Sub-  
29 ject Headings (MeSH). Here we report the MeSH annotation of the chicken genome and illustrate  
30 some features of different MeSH-based analyses, including MeSH-informed enrichment analysis and  
31 MeSH-guided semantic similarity among terms and gene products, using two lists of chicken genes  
32 available in public repositories. The two published datasets that were employed represent (i) differ-  
33 entially expressed genes and (ii) candidate genes under selective sweep or epistatic selection. The  
34 comparison of MeSH with GO overrepresentation analyses suggested not only that MeSH supports  
35 the findings obtained from GO analysis but also that MeSH is able to further enrich the representa-  
36 tion of biological knowledge and often provide more interpretable results. Based on the hierarchical  
37 structures of MeSH and GO, we computed semantic similarities among vocabularies as well as se-  
38 mantic similarities among selected genes. These yielded the similarity levels between significant  
39 functional terms, and the annotation of each gene yielded the measures of gene similarity. Our  
40 findings show the benefits of using MeSH as an alternative choice of annotation in order to draw  
41 biological inferences from a list of genes of interest, and we demonstrate that since it is based on  
42 keywords from published studies, it has the potential provide easily interpretable functional impli-  
43 cations. We argue that the use of MeSH in conjunction with GO will be instrumental in facilitating  
44 the understanding of the genetic basis of complex traits.

## 45 Introduction

46 Understanding the genetic basis of variation for complex traits remains a fundamental goal of  
47 biology. Different approaches, including whole-genome scans and genome-wide expression studies,  
48 have been used in order to identify individual genes underlying economically relevant traits in a  
49 wide spectrum of agricultural species. These studies usually generate lists of genes potentially  
50 involved in the phenotypes under study. The challenge is to translate these lists of candidate genes  
51 into a better understanding of the biological phenomena involved. It is increasingly accepted that  
52 overrepresentation or enrichment analysis (Drăghici et al., 2003) can provide further insights into  
53 the biological pathways and processes affecting complex traits.

54 Recently, the Medical Subject Headings (MeSH) vocabulary (Nelson et al., 2004) has been  
55 proposed for defining functional sets of genes in the context of enrichment analysis. MeSH is  
56 a controlled life sciences vocabulary maintained by the National Library of Medicine to index  
57 documents in the MEDLINE database. Each bibliographic reference in the MEDLINE database  
58 is associated with a set of MeSH terms that describe the content of the publication. Importantly,  
59 MeSH contains a substantially more diverse and extensive range of categories than that of Gene  
60 Ontology (GO) (Ashburner et al., 2000), which is probably the most popular among the initiatives  
61 for defining functional classes of genes (Nakazato et al., 2008). Therein, GO terms are classified into  
62 three domains: biological processes, molecular functions, and cellular components. This ontology  
63 has been successfully used for dissecting relevant traits in livestock species (e.g, Peñagaricano et al.,  
64 2013; Gamba et al., 2013). Similarly, each MeSH term is clustered into 19 different categories; some  
65 MeSH categories, such as Diseases, are not included in GO, whereas other functional categories,  
66 such as Phenomena and Processes or Chemicals and Drugs, share similar concepts with those of  
67 GO. The recent availability of MeSH software packages has rendered agricultural species amenable  
68 to MeSH-based analysis (Tsuyuzaki et al., 2015). For instance, MeSH enrichment analysis has been  
69 successfully applied to dairy cattle, swine, and horse datasets (Morota et al., 2015). This study  
70 showed the potential of MeSH for enhancing the biological interpretation of sets of genes in these  
71 three domestic animals.

72 The main objective of the current study was to report for the first time the MeSH annotation  
73 of the chicken genome, and to illustrate the features of different MeSH-based analyses, including  
74 MeSH-informed enrichment analysis and MeSH-guided semantic similarity among terms and gene  
75 products. For this purpose, we used two lists of selected genes available in public repositories: (i)  
76 differentially expressed genes reported in a RNA-seq study (Zhuo et al., 2015) and (ii) candidate  
77 genes historically impacted by selection detected in a whole-genome scan using a broad spectrum  
78 of populations (Beissinger et al., 2015). The results of the MeSH-based enrichment analysis were  
79 contrasted with GO terms. The use of MeSH and GO terms in functional genomics studies was  
80 further explored through computing the similarity between significant functional terms as well  
81 as the similarity between significant genes by leveraging the hierarchies of these two controlled  
82 vocabularies.

## 83 Materials and Methods

84 We used two datasets from previously published studies with the objective of demonstrate some  
85 capabilities of different MeSH-based analyses in chicken. The first dataset includes 263 genes that  
86 showed differential expression in abdominal fat tissue between high and low feed efficiency broiler  
87 chickens (Zhuo et al., 2015). The second dataset contains 352 genes identified by a whole-genome  
88 scan using Ohta's between-population linkage disequilibrium measure,  $D_{IS}^2$ , in a panel that included  
89 72 different chicken breeds (Beissinger et al., 2015). In both datasets, the list of background genes  
90 was defined as all annotated genes in the chicken genome available in NCBI.

91 The suite of MeSH (Tsuyuzaki et al., 2015) and the GOstats (Falcon and Gentleman, 2007)  
92 packages in Bioconductor were used for performing a hypergeometric test in the enrichment analysis.  
93 This test evaluates whether a given functional term or vocabulary is enriched or overrepresented  
94 with selected genes. In particular, the  $P$ -value of observing  $g$  significant genes in a functional term  
95 (i.e. MeSH or GO term) was calculated by

$$Pvalue = 1 - \sum_{i=0}^{g-1} \frac{\binom{S}{i} \binom{N-S}{k-i}}{\binom{N}{k}}$$

96 where  $S$  is the total number of selected genes,  $N$  is the total number of analyzed genes, and  $k$  is  
97 the total number of genes in the functional term under study. The hierarchical structures of MeSH  
98 and GO permitted us to compute semantic similarities between functional terms (Lord et al., 2003;  
99 Pesquita et al., 2009). This is a metric between two terms on the basis of their biological meanings  
100 of annotation: the closer two terms are in the hierarchy, the higher the similarity measure is between  
101 these terms. We employed the information content-based Jiang and Conrath's measure (Jiang and  
102 Conrath, 1998) to compute the pairwise similarities within GO ontologies and MeSH headings.  
103 The semantic similarity measure between two terms  $t_1$  and  $t_2$  is given by the information content  
104  $IC(t) = -\log p(t)$ , where  $p(t)$  is the probability of occurrence of the term  $t$  and its children terms  
105 in MeSH or GO hierarchy. The semantic distance metric is a function of

$$Dist = IC(t_1) + IC(t_2) - 2IC(MICA),$$

106 where MICA is the most informative common ancestor.

107 We further computed semantic similarity between selected genes by aggregating their MeSH  
108 or GO terms assigned. This is a similarity measure at the level of genes which is analogous to a  
109 similarity matrix among SNPs (Morota and Gianola, 2013). We calculated similarity scores over  
110 all pairs of terms between the two vocabulary sets of genes under consideration. All these GO  
111 and MeSH-guided semantic similarity analyses were carried out using the GOSemSim (Yu et al.,  
112 2010) and the MeSHSim (Zhou et al., 2015) Bioconductor packages, respectively. GO-based gene  
113 semantic similarity yielded category specific measures, whereas the MeSH counterpart produced a  
114 single measure by setting similarity to zero if two terms belong to different MeSH categories. For  
115 this reason, we selected exactly the same genes as were identified in GO categories when computing  
116 MeSH-based gene similarity to allow direct comparisons between these two functional vocabularies.  
117 Source code and reproducible output reports generated by R Markdown are available as Supporting  
118 Files.

## 119 **Data Availability**

120 The two datasets used in the current study have already been published. The gene expression data  
121 can be downloaded from <http://journals.plos.org/plosone/article?id=10.1371/journal.pone.0135810#sec025>.  
122 Raw data for the selective sweep data are available from <http://dx.doi.org/10.6084/m9.figshare.1497961>,  
123 and selected genes can be found in Beissinger et al. (2015).

## 124 **Results**

### 125 **Summary of MeSH and GO annotations**

126 The organism and the biomaRt Bioconductor packages were queried to annotate genes by MeSH  
127 and GO terms. Table 1 shows the total number of genes (background and selected genes) annotated  
128 by MeSH and GO in each of the datasets under study. Both MeSH and GO terms had a similar  
129 number of annotated known genes, whereas the number of selected genes with MeSH terms assigned  
130 was about one-half of that of GO. It is important to note that this difference could be because the  
131 majority of chicken genes are annotated by Inferred from Electronic Annotation (evidence code:  
132 IEA) in GO, whereas all MeSH terms are assigned by manual curation at NCBI. We expect that  
133 over time, MeSH will improve as new knowledge is created and published in the scientific literature.

### 134 **Enrichment analysis**

135 Gene Expression Data: A subset of significant MeSH terms (P-value  $\leq 0.05$ ) enriched with differ-  
136 entially expressed genes detected in fat tissue between high and low feed efficiency chickens are  
137 highlighted in Table 2. The majority of the MeSH terms in the Chemicals and Drugs category  
138 are related to lipid deposition and lipid metabolism. For instance, *Lipoproteins* (MeSH:D008074),  
139 and *Apolipoproteins* (MeSH:D001053) are closely related to lipid transportation. Additionally,  
140 *Fatty Acid-Binding Proteins* (MeSH:D050556) regulates diverse lipid signals, while *PPAR alpha*  
141 (MeSH:D047493) controls lipid and lipoprotein metabolism. Interestingly, many GO terms re-

lated to lipid deposition and metabolism, such as *cholesterol metabolic process* (GO:0008203),  
*high-density lipoprotein particle assembly* (GO:0034380), *spherical high-density lipoprotein particle*  
*(GO:0034366)*, and *high-density lipoprotein particle binding* (GO:0008035), were also significantly  
enriched with differentially expressed genes (File S1). Similarly, MeSH terms related to Wnt proteins  
and signalling pathways, such as *Wnt Proteins* (MeSH:D051153), *Wnt4 Protein* (MeSH: D060528),  
*Wnt1 Protein* (MeSH:D051155), and their counterparts in GO, such as *regulation of Wnt signal-*  
*ing pathway* (GO:0030111) and *Wnt signaling pathway* (GO:0016055), were found as significant.  
The Wnt proteins are known to interact with lipids. We also found *Steroid 17-alpha-Hydroxylase*  
(MeSH:D013254) and *steroid 17-alpha-monooxygenase activity* (GO:0004508) as significant terms;  
these two categories are enriched in genes involved in the synthesis of lipids. Moreover, we detected  
some MeSH terms related to the immune system regulation (e.g., *Interleukin-6* (MeSH:D015850)  
and *Chemokines* (MeSH:D018925)). Lastly, *Glycoproteins* (MeSH:D006023), is produced from the  
gene *AHSG* and plays a role in glucose metabolism and the regulation of insulin signaling. Taken  
together, our findings confirm that MeSH enrichment analysis can either reinforce findings from  
GO or even bring an additional biological insight. Figure 1 depicts the semantic similarity between  
significant MeSH terms in the Chemicals and Drugs category. In general, this subset of MeSH terms  
showed low to high levels of semantic similarity.

For the Diseases category, which is unique to MeSH-based analysis, a subset of significant  
MeSH terms that deserves particular attention in the area of feed efficiency and lipid metabolism  
in poultry is highlighted in Table 2. For instance, *Hyperplasia* (MeSH:D006965) is a potential  
contributor to abdominal fat mass in broiler chickens; its relationship with *Diabetes Mellitus, Type 2*  
(MeSH:D003924) is well-documented in humans. Some MeSH terms directly related to the immune  
function, such as *Newcastle Disease* (MeSH:D009521) and *Inflammation* (MeSH:D007249), also  
showed a significant enrichment with differentially expressed genes. Interestingly, *Hyperplasia* and  
*Inflammation* showed a moderate semantic similarity according to the MeSH hierarchy (File S1).

Selective Sweep Data: Table 2 shows the results of the MeSH-informed enrichment analysis  
using genes putatively swept or under epistatic selection derived from a chicken diversity panel.  
Most of these terms are related to insulin metabolism. For instance, resistance to insulin occurs  
in birds due to high plasma glucose and fatty acid levels; this is supported by *Insulin Resistance*



171 (MeSH:D007333) in both the Diseases and Phenomena and Processes categories, as well as *Recep-*  
172 *tor*, *Insulin* (MeSH:D011972) and *Insulin* (MeSH:D007328) in the Chemicals and Drugs category.  
173 Moreover, we identified MeSH terms involved in the circadian clock of chicken. These are *Period*  
174 *Circadian Proteins* (MeSH:D056950), *CLOCK Proteins* (MeSH:D056926) and *ARNTL Transcrip-*  
175 *tion Factors* (MeSH:D056930) in Chemicals and Drugs, as well as *E-Box Elements* (MeSH:D024721),  
176 *Biological Clocks* (MeSH:D001683), and *Light* (MeSH:D008027) in Phenomena and Processes. Fig-  
177 ure 2 shows the semantic similarities among MeSH terms in the Chemicals and Drugs category.  
178 Biological clock-related annotations, such as *Period Circadian Proteins* and *CLOCK Proteins*, ex-  
179 hibited moderate to high similarity. The results obtained from the other MeSH and GO categories  
180 were shown in File S2.

## 181 Gene semantic similarity

182 Gene Expression Data: Comparison of gene semantic similarity between MeSH and GO Biolog-  
183 ical Process for a subset of significant genes from the RNA-seq dataset is depicted in Figure 3.  
184 MeSH-based gene semantic similarity analysis showed that genes related to energy reserve metabolic  
185 process are highly related. For instance, genes that are involved in triacylglycerol and cholesterol  
186 biosynthesis, such as methylsterol monooxygenase 1 (*MSMO1*), insulin induced gene 1 (*INSIG1*),  
187 1-acylglycerol-3-phosphate O-acyltransferase 9 (*AGPAT9*), and ADP ribosylation factor like GT-  
188 Pase 2 binding protein (*ARL2BP*), were highly similar to each other based on the MeSH hierarchy.  
189 Interestingly, GO-based analysis produced slightly different results; for instance, the gene *MSMO1*  
190 was highly similar to *INSIG1* but moderately similar to *AGPAT9* and *ARL2BP*. Additionally,  
191 genes *MSMO1* and *INSIG1* were moderately or highly related to lecithin-cholesterol acyltransferase  
192 (*LCAT*) and cytochrome b5 type A (microsomal) (*CYB5A*) based on the GO structure. These two  
193 genes, involved in lipid metabolism, also showed high similarity to apolipoprotein A-I (*APOA1*)  
194 and cytochrome P450, family 17, subfamily A, polypeptide 1 (*CYP17A1*). The relationship among  
195 these genes were low to moderate based on the MeSH hierarchy. The results based on the GO  
196 Molecular Function and Cellular Component categories were presented in File S3.

197 Selective Sweep Data: Gene semantic similarity based on both MeSH and GO Biological Process

198 among a subset of genes under selection is shown in Figure 4. Notably, a large group of genes, includ-  
199 ing strawberry notch homolog 1 (*Drosophila*) (*SBNO1*), ARP5 actin-related protein 5 (*ACTR5*),  
200 SET domain containing 1B (*SETD1B*), Obg-like ATPase 1 (*OLA1*), and histone deacetylase 9  
201 (*HDAC9*) were highly related based on both MeSH and GO-guided semantic similarity analyses.  
202 All these genes are involved in chromatin organization and regulation of gene expression. More-  
203 over, particular attention was paid to the top five candidates under epistatic selection reported  
204 by Beissinger et al. (2015). These genes are adenylate cyclase 5 (*ADCY5*), myosin light chain  
205 kinase (*MYLK*), phosphatidylinositol-4,5-bisphosphate 3-kinase, catalytic subunit beta (*PIK3CB*),  
206 calcium binding protein 39 (*CAG39*), and interleukin 1 receptor accessory protein (*IL1RAP*). Al-  
207 though none of these pair of genes appeared in a GO-based similarity matrix, *ADCY5* and *MYLK*  
208 presented a low to moderate gene semantic similarity based on the MeSH hierarchy (File S4).

## 209 Discussion

210 This article reports the MeSH annotation of the chicken genome. This new set of information  
211 enabled us to carry out different MeSH-based analyses, including enrichment analysis and MeSH-  
212 guided semantic similarity among functional terms and gene products. We exemplified the potential  
213 usefulness of these MeSH-based approaches by using two different publicly available chicken data.

214 The adipose tissue is the major site for lipid deposition and lipid metabolism, and it plays  
215 a central role in energy homeostasis. Unsurprisingly, several MeSH terms closely related to fat  
216 metabolism, such as Lipoproteins, Apolipoproteins, Fatty Acid-Binding Proteins, and PPAR alpha,  
217 were significantly enriched with genes that showed differential expression in fat tissue between high  
218 and low feed efficiency broiler chickens. Moreover, adipose tissue is now recognized as a metabolically  
219 active tissue that has important endocrine and immune regulatory functions (Kershaw and Flier,  
220 2004). Interestingly, we found many significant MeSH terms, such as Interleukin-6, Chemokines,  
221 and Immunoglobulins, that are closely associated with the regulation of the immune function.  
222 Overall, our MeSH-based findings provide further insights into the biological mechanisms underlying  
223 differences in adiposity between high and low feed efficiency broiler chickens.

224 Included in our exemplary applications of MeSH annotations is a set of 352 genes previously iden-

225 tified as putatively affected by selection. Genes identified through population-genetic approaches  
226 such as this can be elusive, because their identification does not rely on phenotypes. Therefore  
227 associating selection with any specific trait is often very difficult (Akey, 2009). As we demonstrate  
228 in this study, tools such as GO and now MeSH are useful for suggesting biological interpretations  
229 that can later be followed up on or drive future biological hypotheses. For instance, our results  
230 showed that insulin-related MeSH terms appeared unusually often in the set of genes impacted by  
231 selection. This implies that selection for insulin-related traits may have played an important role  
232 in differentiating chicken breeds. Furthermore, our analysis involved testing for semantic similarity  
233 between pairs of genes, which was particularly useful for evaluating the most promising gene-pairs  
234 highlighted by Beissinger et al. (2015) as candidates for epistatic selection. Our expectation was  
235 that these pairs of genes are likely to be related to each other, as they have been predicted to be  
236 involved in the same selected phenotype. Our finding that one pair showed at least a weak semantic  
237 similarity may be interpreted as evidence that these two genes, *ADCY5* and *MYLK* are the most  
238 likely among the set to truly be epistatic.

239 The recent advancement in cataloguing genes with MeSH and GO has made it possible to assess  
240 the role of selected genes and has opened new opportunities for genetic research. Enrichment  
241 analysis recapitulates a set of genes into higher-level biological features. We argue that obtaining  
242 a complete picture of genes of interest using MeSH and GO is an important initial step toward  
243 functional genomics studies in poultry as well as other agricultural species as it facilitates efforts to  
244 illuminate the genetic basis of phenotypic variation.

## 245 Acknowledgements

246 This work was supported in part by the University of Nebraska Layman Fund to G.M. Support  
247 for T.M.B. was provided by USDA-ARS. F.P. acknowledges financial support from the Florida  
248 Agricultural Experiment Station and the Department of Animal Sciences, University of Florida.

## References

- 249
- 250 Akey, J. M. (2009). Constructing genomic maps of positive selection in humans: Where do we go  
251 from here? *Genome Res.*, 19:711–722.
- 252 Ashburner, M., Ball, C. A., Blake, J. A., Botstein, D., Butler, H., Cherry, J. M., Davis, A. P.,  
253 Dolinski, K., Dwight, S. S., Eppig, J. T., Harris, M. A., Hill, D. P., Issel-Tarver, L., Kasarskis,  
254 A., Lewis, S., Matese, J. C., Richardson, J. E., Ringwald, M., Rubin, G. M., and Sherlock, G.  
255 (2000). Gene Ontology: tool for the unification of biology. *Nat Genet.*, 25:25–29.
- 256 Beissinger, T. M., Gholami, M., Erbe, M., Weigend, S., Weigend, A., de Leon, N., Gianola, D., and  
257 Simianer, H. (2015). Using the variability of linkage disequilibrium between subpopulations to  
258 infer sweeps and epistatic selection in a diverse panel of chickens. *Heredity*, Advance online.
- 259 Drăghici, S., Khatra, P., Martinsb, R. P., Ostermeier, G. C., and Krawetz, S. A. (2003). Global  
260 functional profiling of gene expression. *Genomics*, 81:98–104.
- 261 Falcon, S. and Gentleman, R. (2007). Using GOstats to test gene lists for GO term association.  
262 *Bioinformatics*, 23:257–258.
- 263 Gamba, R., Peñagaricano, F., Kropp, J., Khateeb, K., Weigel, K. A., Lucey, J., and Khatib, H.  
264 (2013). Genomic architecture of bovine  $\kappa$ -casein and  $\beta$ -lactoglobulin. *J Dairy Sci.*, 96:5333–5343.
- 265 Jiang, J. and Conrath, D. (1998). Semantic similarity based on corpus statistics and lexical tax-  
266 onomy. In *Proceedings of the 10th International Conference on Research in Computational Lin-*  
267 *guistics*, Taiwan.
- 268 Kershaw, E. E. and Flier, J. S. (2004). Adipose tissue as an endocrine organ. *J Clin Endocrinol*  
269 *Metab.*, 89:2548–2556.
- 270 Lord, P. W., Stevens, R. D., Brass, A., and Goble, C. A. (2003). Investigating semantic simi-  
271 larity measures across the Gene Ontology: the relationship between sequence and annotation.  
272 *Bioinformatics*, 19:1275–1283.

- 273 Morota, G. and Gianola, D. (2013). Evaluation of linkage disequilibrium in wheat with an L1-  
274 regularized sparse Markov network. *Theor Appl Genet.*, 126:1991–2002.
- 275 Morota, G., Peñagaricano, F., Petersen, J. L., Ciobanu, D. C., Tsuyuzaki, K., and Nikaido, I.  
276 (2015). An application of MeSH enrichment analysis in livestock. *Anim Genet.*, 46:381–387.
- 277 Nakazato, T., Takinaka, T., Mizuguchi, H., Matsuda, H., Bono, H., and Asogawa, M. (2008).  
278 Biocompass: a novel functional inference tool that utilizes MeSH hierarchy to analyze groups of  
279 genes. *In Silico Biol.*, 8:53–61.
- 280 Nelson, S. J., Schopen, M., Savage, A. G., Schulman, J. L., and Arluk, N. (2004). The MeSH  
281 translation maintenance system: structure, interface design, and implementation. *Stud. Health  
282 Technol. Inform.*, 107:67–69.
- 283 Peñagaricano, F., Weigel, K. A., Rosa, G. J. M., and Khatib, H. (2013). Inferring quantitative  
284 trait pathways associated with bull fertility from a genome-wide association study. *Front Genet.*,  
285 3:307.
- 286 Pesquita, C., Faria, D., Falcão, A. O., Lord, P., and Couto, F. M. (2009). Semantic similarity in  
287 biomedical ontologies. *PLoS Comput. Biol.*, 5:e1000443.
- 288 Tsuyuzaki, K., Morota, G., Ishii, M., Nakazato, T., Miyazaki, S., and Nikaido, I. (2015). MeSH  
289 ORA framework: R/Bioconductor packages to support MeSH over-representation analysis. *BMC  
290 Bioinformatics*, 16:45.
- 291 Yu, G., Li, F., Qin, Y., Bo, X., Wu, Y., and Wang, S. (2010). GOSemSim: an R package for  
292 measuring semantic similarity among GO terms and gene products. *Bioinformatics*, 26:976–978.
- 293 Zhou, J., Shui, Y., Peng, S., Li, X., Mamitsuka, H., and Zhu, S. (2015). MeSHSim: An  
294 R/Bioconductor package for measuring semantic similarity over MeSH headings and MEDLINE  
295 documents. *J. Bioinform. Comput. Biol.*, Online Ready.
- 296 Zhuo, Z., Lamont, S. J., Lee, W. R., and Abasht, B. (2015). RNA-seq analysis of abdominal fat  
297 reveals differences between modern commercial broiler chickens with high and low feed efficiencies.  
298 *PLoS ONE*, 10:e0135810.

## 299 Supporting Information

- 300 • File S1: MeSH over-representation analysis (RNA-seq data)
- 301 • File S2: MeSH over-representation analysis (Selective sweep data)
- 302 • File S3: Gene Semantic Similarity (RNA-seq data)
- 303 • File S4: Gene Semantic Similarity (Selective sweep data)

## 304 Tables

Table 1: Number of known and selected genes annotated by MeSH (Medical SubjectHeadings) and GO (Gene Ontology).

| Data            | Annotated Genes |       | Selected Genes |      |     |
|-----------------|-----------------|-------|----------------|------|-----|
|                 | MeSH            | GO    | Total          | MeSH | GO  |
| RNA-seq         |                 |       | 263            | 110  | 245 |
| Selective Sweep | 10227           | 12460 | 352            | 145  | 333 |

Table 2: A subset of statistically significant MeSH (Medical Subject Headings) terms. Background and Selected denote the number of background genes and selected genes annotated by the MeSH term, respectively.

| Data    | Category                | MeSH ID | Background                  | Selected | MeSH Term                           |
|---------|-------------------------|---------|-----------------------------|----------|-------------------------------------|
| RNA-seq | Chemicals and Drugs     | D008074 | 14                          | 4        | <i>Lipoproteins</i>                 |
|         |                         | D001054 | 7                           | 2        | <i>Apolipoproteins A</i>            |
|         |                         | D001053 | 5                           | 2        | <i>Apolipoproteins</i>              |
|         |                         | D050556 | 17                          | 3        | <i>Fatty Acid-Binding Proteins</i>  |
|         |                         | D047493 | 7                           | 2        | <i>PPAR alpha</i>                   |
|         |                         | D012177 | 6                           | 2        | <i>Retinol-Binding Proteins</i>     |
|         |                         | D051153 | 91                          | 8        | <i>Wnt Proteins</i>                 |
|         |                         | D060528 | 8                           | 3        | <i>Wnt4 Proteins</i>                |
|         |                         | D051155 | 19                          | 2        | <i>Wnt1 Proteins</i>                |
|         |                         | D015850 | 25                          | 4        | <i>Interleukin-6</i>                |
|         |                         | D018925 | 14                          | 2        | <i>Chemokines</i>                   |
|         |                         | D007136 | 76                          | 5        | <i>Immunoglobulins</i>              |
|         |                         | D013254 | 1                           | 1        | <i>Steroid 17-alpha-Hydroxylase</i> |
|         |                         | D006023 | 120                         | 15       | <i>Glycoproteins</i>                |
|         |                         | D006965 | 1                           | 1        | <i>Hyperplasia</i>                  |
|         |                         | D003924 | 2                           | 1        | <i>Diabetes Mellitus, Type 2</i>    |
|         |                         | D009521 | 9                           | 3        | <i>Newcastle Disease</i>            |
| D014802 | 5                       | 2       | <i>Vitamin A Deficiency</i> |          |                                     |
| D007249 | 12                      | 2       | <i>Inflammation</i>         |          |                                     |
| Sweeps  | Chemicals and Drugs     | D011972 | 2                           | 8        | <i>Receptor, Insulin</i>            |
|         |                         | D007328 | 26                          | 3        | <i>Insulin</i>                      |
|         |                         | D056950 | 5                           | 2        | <i>Period Circadian Proteins</i>    |
|         |                         | D056926 | 8                           | 2        | <i>CLOCK Proteins</i>               |
|         |                         | D056930 | 6                           | 2        | <i>ARNTL Transcription Factors</i>  |
|         | Diseases                | D007333 | 1                           | 1        | <i>Insulin Resistance</i>           |
|         |                         | D007333 | 1                           | 1        | <i>Insulin Resistance</i>           |
|         | Phenomena and Processes | D024721 | 8                           | 2        | <i>E-Box Elements</i>               |
|         |                         | D001683 | 13                          | 2        | <i>Biological Clocks</i>            |
|         |                         | D008027 | 28                          | 3        | <i>Light</i>                        |



305 **Figures**

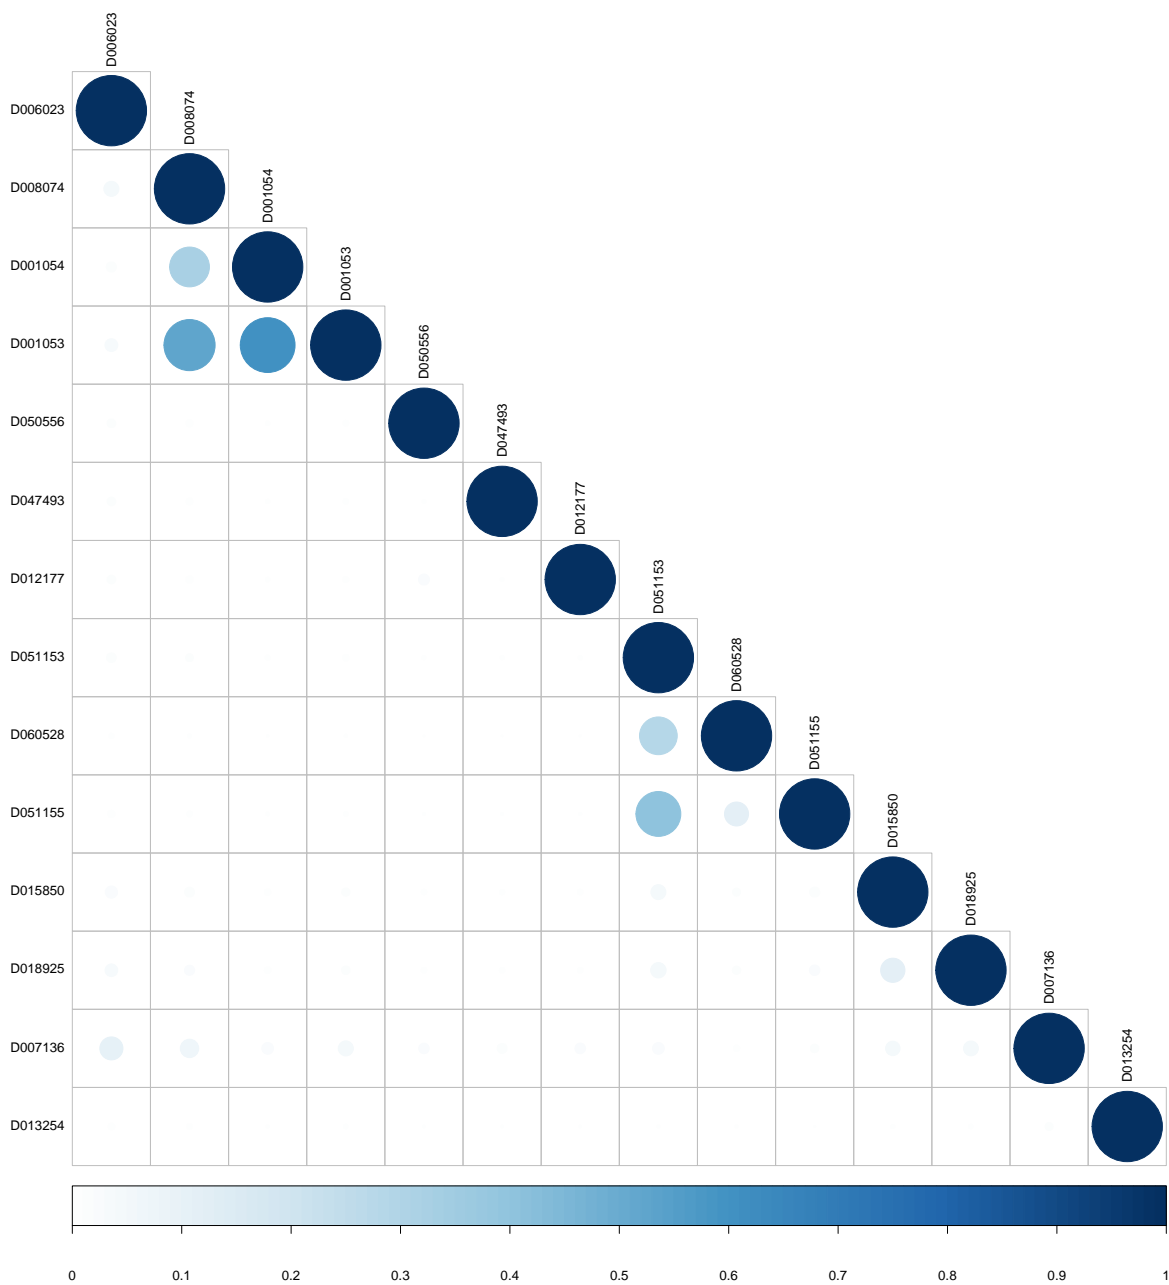

Figure 1: MeSH semantic similarity for the RNA-seq dataset.

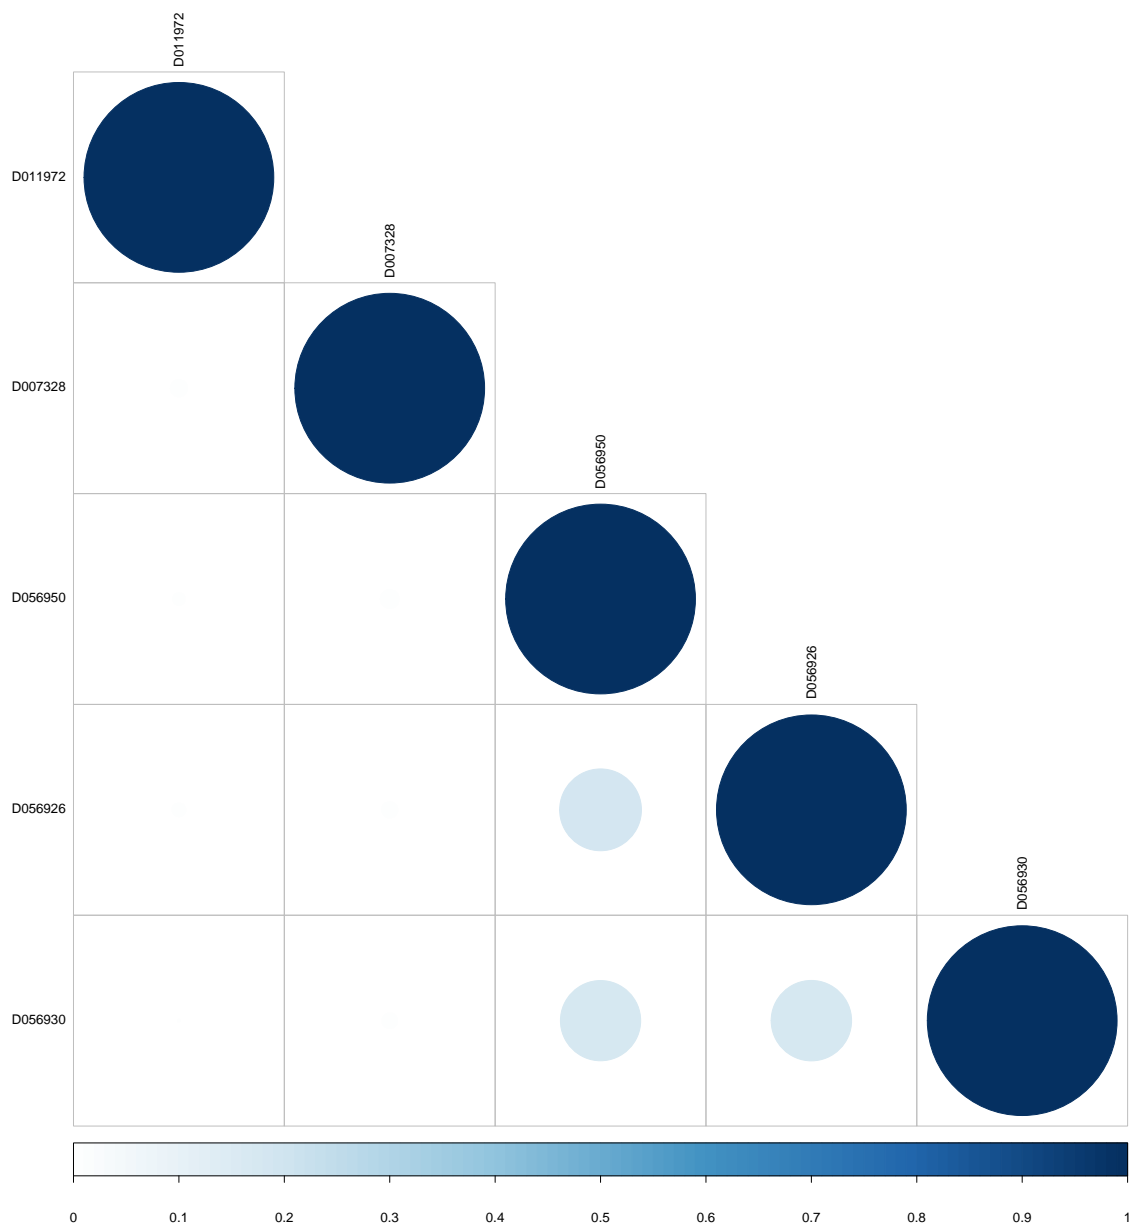

Figure 2: MeSH semantic similarity for the selective sweep dataset.

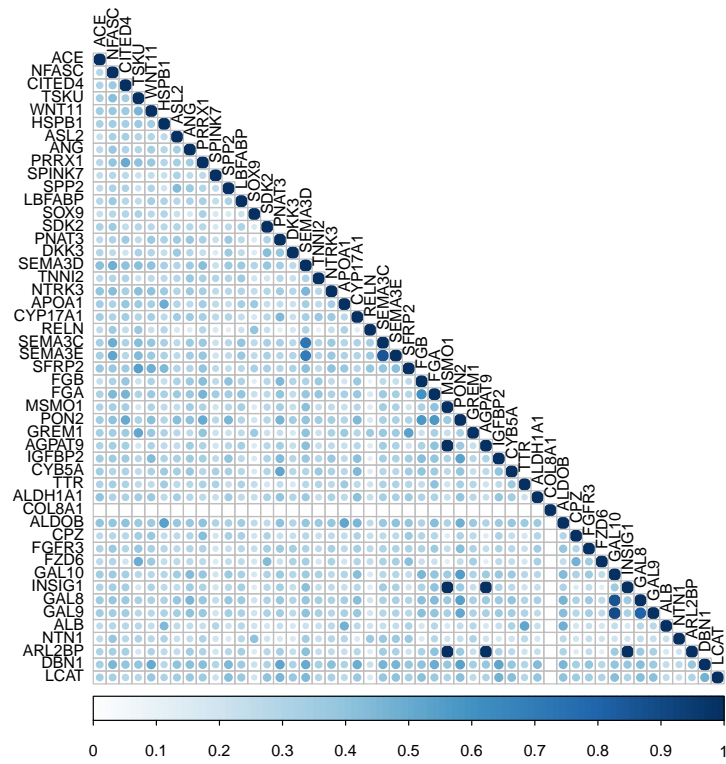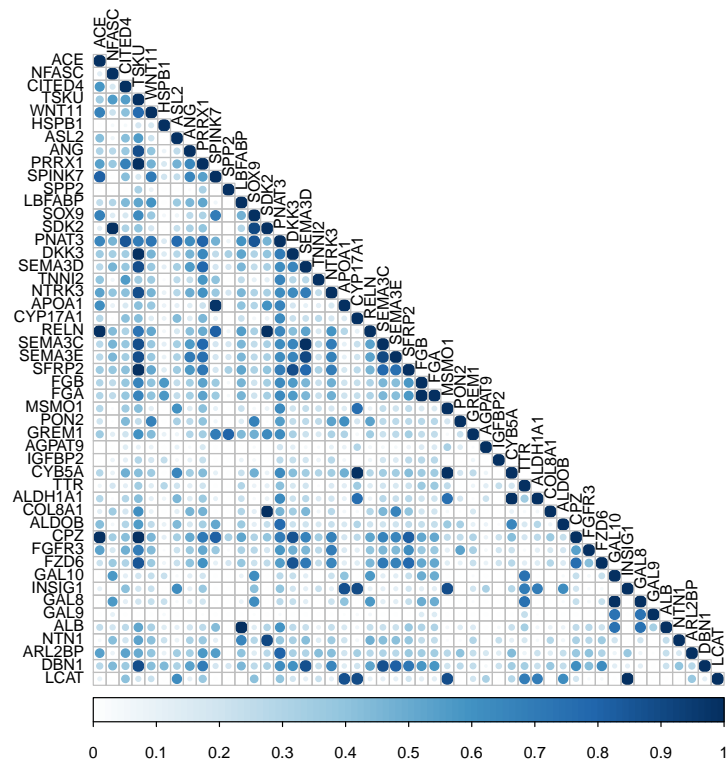

Figure 3: Gene semantic similarity for the RNA-seq dataset. Top:MeSH, Bottom:GO

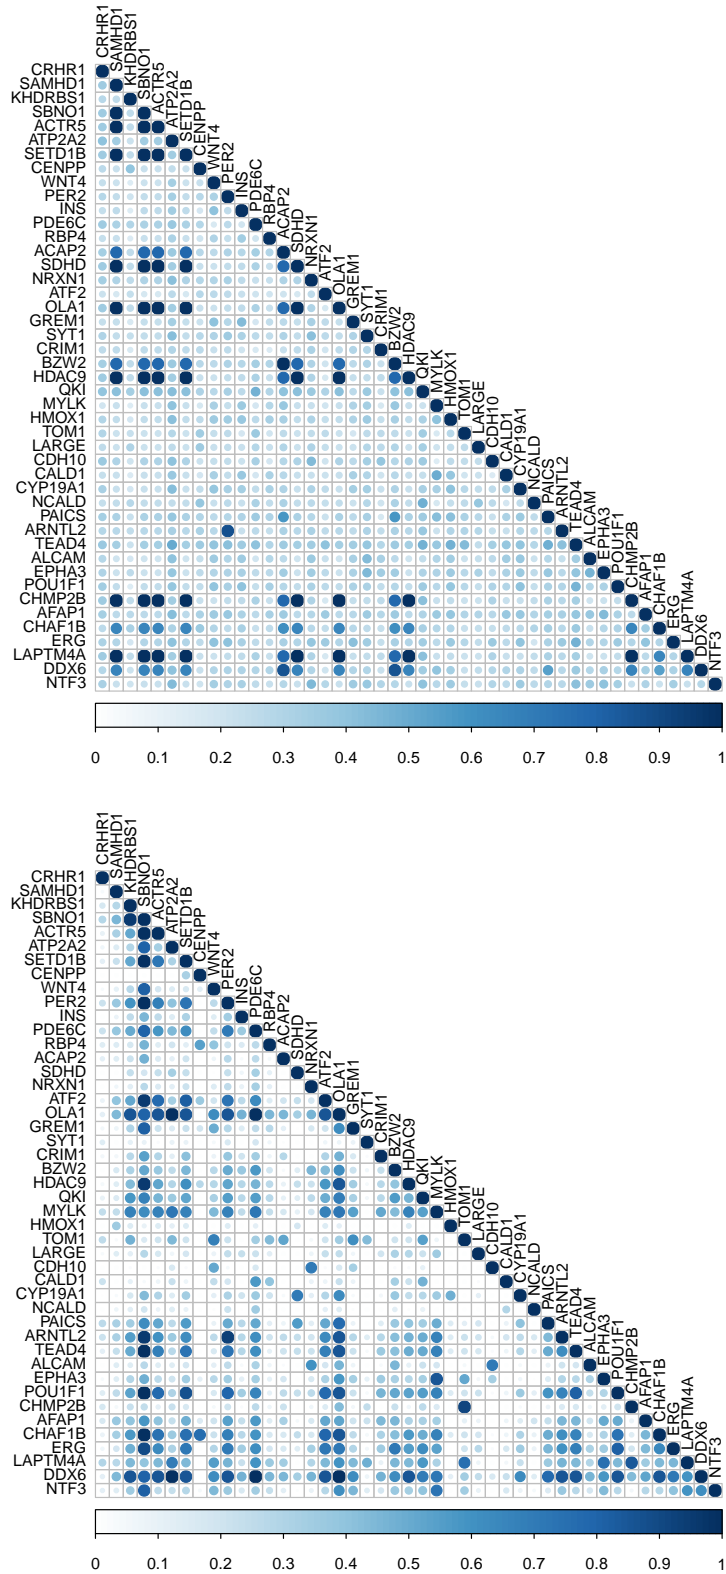

Figure 4: Gene semantic similarity for the selective sweep dataset. Top:MeSH, Bottom:GO
